# Supplementary material for: Characterizing Clinical and Hormonal Profiles of Acne in North African Women with Polycystic Ovary Syndrome
Source: Research Square preprint supplement (doi:10.21203/rs.3.rs-4889348/v1), 2024-09-06
Supplement: Supplementary file 1 [file 02f59fd55f152b1abfff0f3a.docx]

Table IV: Assessment of Gonadotropic Hormones in G1 and G2

| **Assessment of Gonadotropic Hormones** | **G1**  **[Q1–Q3]** | **G2**  **[Q1–Q3]** | ***P*** |
| --- | --- | --- | --- |
| FSH (median in UI/l) | 6 [5– 7.51] | 7.58 [6.22– 9.11] | 0.69 |
| LH (median in mUl/ml) | 9.22 [5.9 – 13] | 5.65 [4.87– 7.21] | <10-3 |
| LH/FSH Ratio (Mean, Standard Deviation) | 1.65±0.92 | 0.85±0.45 | <10-3 |
| <1  LH/FSH Ratio >1  =1 | 36 (25.9)  101 (72.7)  2 (1.4) | 54 (74)  18 (24.6)  1 (1.4) | <10-3  <10-3  0.97 |

*FSH: Follicular Stimulating Hormone, LH: Luteinic Hormone, G1: Group 1, G2: Group 2*
