# Supplementary material for: Characterizing Clinical and Hormonal Profiles of Acne in North African Women with Polycystic Ovary Syndrome
Source: Research Square preprint supplement (doi:10.21203/rs.3.rs-4889348/v1), 2024-09-06
Supplement: Supplementary file 2 [file 2ea8c7353de949ad13e1bf90.docx]

Table II: Evaluation of Hirsutism among G1 and G2

| **Evaluation of hirsutism** | **G1**  **n (%)** | | | **G2**  **n (%)** | ***P*** | |
| --- | --- | --- | --- | --- | --- | --- |
| Hirsutism | 131 (94.2) | | | 49 (67.1) | <10-3 | |
| Hirsutism Severity  Mild  Moderate  Severe | 76 (54 .7)  50 (36)  7 (5) | | | 36 (49.3)  6 (8.2)  2 (2.7) | 0,46  <10-3  0.43 | |
| Alopecia | | 52 (37.4) | 16 (21.9) | | | 0.02 |
| Alopecia severity Stage 1  Stage 2  Stage 3 | | 50 (36)  2 (1.4)  0 (0) | 16 (21.9)  0 (0)  0 (0) | | | 0.04  0.30  - |

*G1 : Group 1, G2 : Group 2*
