# Supplementary material for: Characterizing Clinical and Hormonal Profiles of Acne in North African Women with Polycystic Ovary Syndrome
Source: Research Square preprint supplement (doi:10.21203/rs.3.rs-4889348/v1), 2024-09-06
Supplement: Supplementary file 3 [file 5837108f91a23a3f6b205060.docx]

Table I: Evaluation of Acne in G1 and G2

| **Evaluation of Acne** | **G1**  **(n %)** | **G2**  **(n %)** | ***P*** |
| --- | --- | --- | --- |
| **Age of Acne Onset**  (mean in years) | 13±3.59 | 12±2.88 | 0.49 |
| **Acne progression pattern**  Persistent  Recurrent  Recent | 74 (53.2)  59 (42.4)  6 (4.3) | 36 (49.3)  36 (49.3)  1 (1.4) | 0.59  0.34  0.25 |
| **Acne rate of progression**  Fast  Average  Slow | 9 (6.5)  33 (23.7)  97 (69.8) | 5 (6.8)  4 (5.5)  64 (87.7) | 0,92  10-3  0.004 |
| **Acne trigger factors**  Premenstrual Period  Skin and Facial Care  Stress  Lack of Sleep  Cosmetic Products  Sun Exposure  Pollution  Physical Activity | 134 (96.4)  19 (13.7)  131 (94.2)  35 (25.2)  49 (35.3)  39 (28.1)  23 (16.5)  5 (3.6) | 68 (39.2)  11 (15.1)  62 (84.9)  20 (27.4)  90 (64.7)  21 (28.8)  25 (34.2)  3 (4.1) | 0.29  0.78  0.02  0.73  0.45  0.52  0.003  0.85 |
| **Type of Acne**  Comedones  Inflammatory Papules  Nodular Lesions | 123 (89.1)  78 (56.1)  24 (17.3) | 61 (83.6)  32 (43.8)  4 (5.5) | 0.25  0.09  0.02 |
| **Severity of Acne**  Almost Clear  Mild  Moderate  Severe  Very Severe | 26 (18.7)  35 (25.2)  65 (46.8)  13 (9.3)  0 (0) | 27 (37)  18 (24.7)  24 (32.9)  4 (5.4)  0 (0) | 0.003  0.26  0.052  0.32  - |

G1 : Group 1, G2 : Group 2
