# Supplementary material for: Characterizing Clinical and Hormonal Profiles of Acne in North African Women with Polycystic Ovary Syndrome
Source: Research Square preprint supplement (doi:10.21203/rs.3.rs-4889348/v1), 2024-09-06
Supplement: Supplementary file 4 [file 7aa329d61fc6e07ed9176b89.docx]

Table III: Gynecological Examination: Anamnesis of Groups G1 and G2

| **Gynecological Examination** | **G1** | **G2** | ***P*** |
| --- | --- | --- | --- |
| Menstruation duration (Means in Days) | 5 | 5 | 0.65 |
| Menstrual cycle disorders (%)  Secondary Amenorrhea  Spaniomenorrhea  Polymenorrhea | 16 (11.5)  74 (53.2)  10 (7.2) | S  1 (1.4)  5 (6.8)  0 (0) | 0.01  <10-3  0.02 |
| **Cycle frequency (Means in cycles)** | 9 | 12 | <10-3 |
| Cycle duration (Means in days) | 50 | 31 | <10-3 |

G1 : Group 1, G2 : Group 2
