# Supplementary material for: Characterizing Clinical and Hormonal Profiles of Acne in North African Women with Polycystic Ovary Syndrome
Source: Research Square preprint supplement (doi:10.21203/rs.3.rs-4889348/v1), 2024-09-06
Supplement: Supplementary file 5 [file 7b900568becf82953cf8b10e.docx]

Table V: Assessment of Sex Hormones in G1 and G2

| **Assessment of Sex Hormones** | **G1** | **G2** | ***P*** |
| --- | --- | --- | --- |
| Testosterone (Mean in ng/mL) | 0.72±0,27 | 0.43±0,15 | <10-3 |
| Hypertestosteronemia n (%) | 113 (81.3) | 12 (16.4) | <10-3 |
| **E2 (Median in pg/mL) [Q1–Q3]** | 57 [48– 70] | 56 [45– 66] | 0.32 |

*E2: Estradiol, G1: Group 1, G2: Group 2*
